# Supplementary material
Source: PubMed Central journal article supplement (PMC387332)

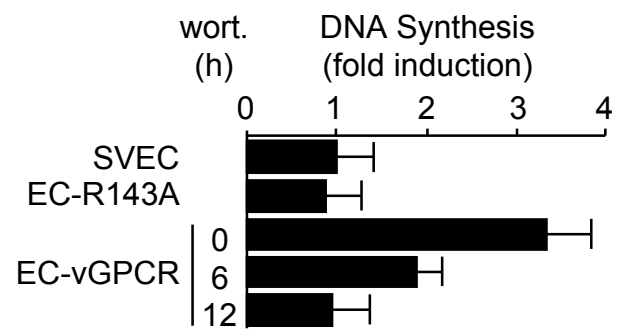

Supplement: pnas_101_14_4821__2.pdf [file pnas_101_14_4821__2.pdf]

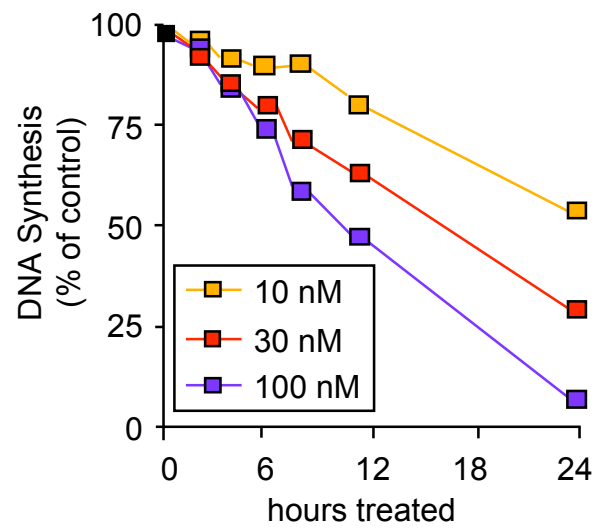

Supplement: pnas_101_14_4821__4.pdf [file pnas_101_14_4821__4.pdf]

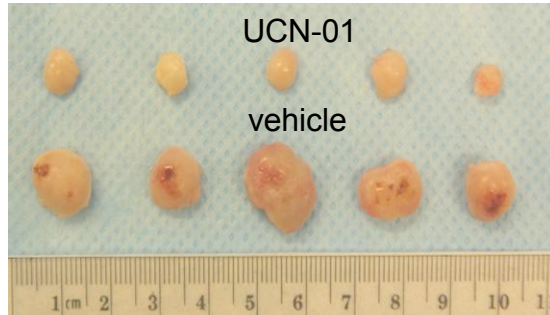

Supplement: pnas_101_14_4821__6.pdf [file pnas_101_14_4821__6.pdf]
